# Supplementary material
Source: PubMed Central journal article supplement (PMC9910840)
Supplement: mmc1.pdf [file mmc1.pdf]

# THE LANCET

## Microbe

### **Supplementary appendix 2**

This appendix formed part of the original submission and has been peer reviewed. We post it as supplied by the authors.

This online publication has been corrected. The corrected version first appeared at [thelancet.com](https://www.thelancet.com) on March 16, 2023

Supplement to: onas Schöley, Ariel Karlinsky, Dmitry Kobak, Charles Tallack. Conflicting COVID-19 excess mortality estimates. *Lancet Microbe* 2023; published online Feb 9. [https://doi.org/10.1016/S0140-6736\(23\)00116-2](https://doi.org/10.1016/S0140-6736(23)00116-2).

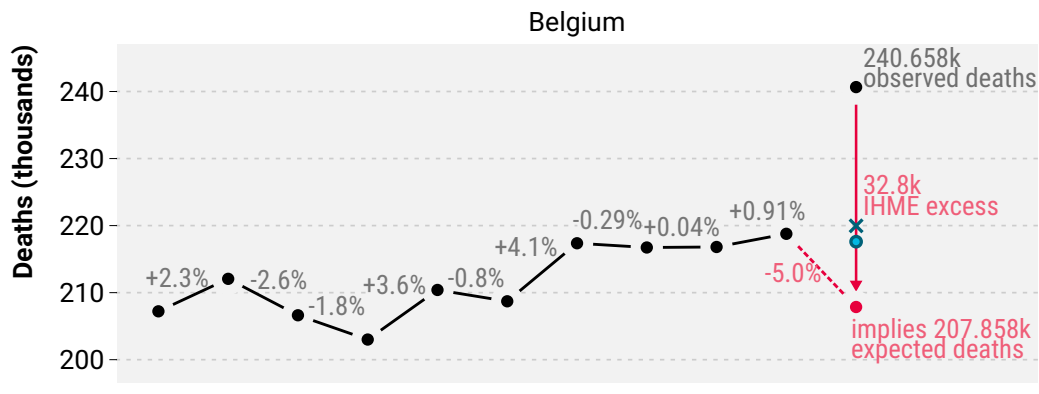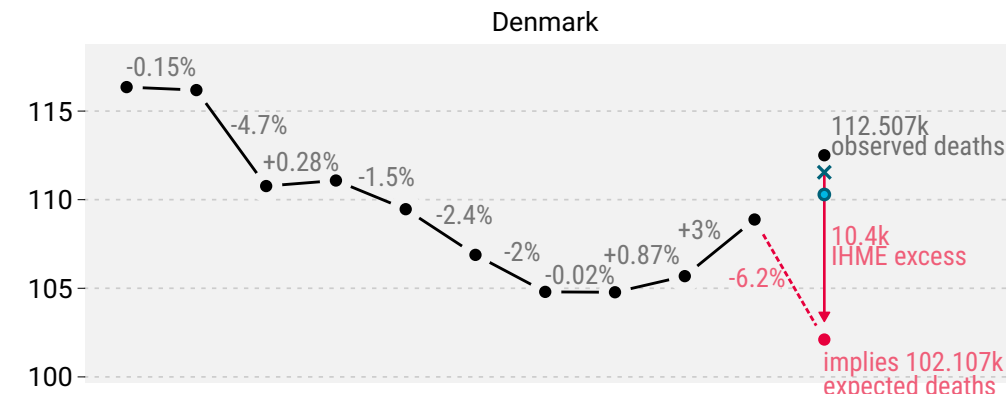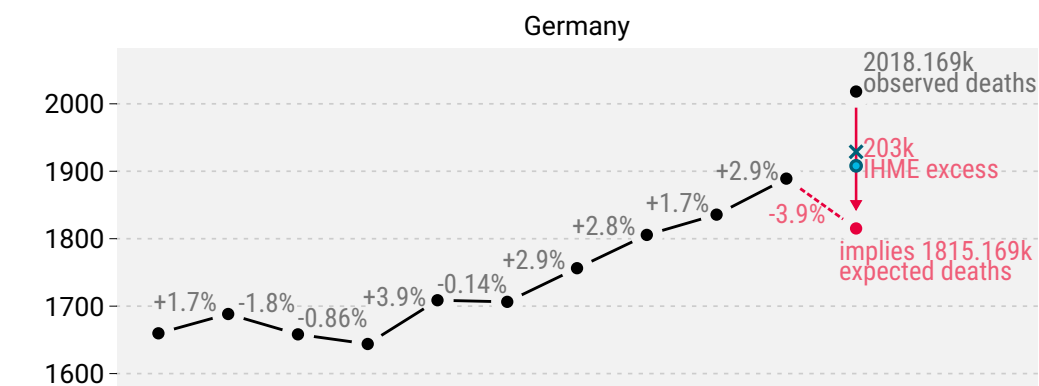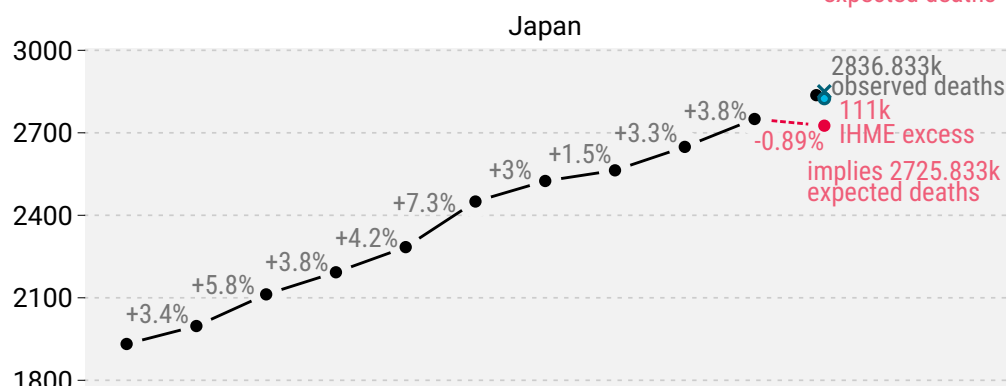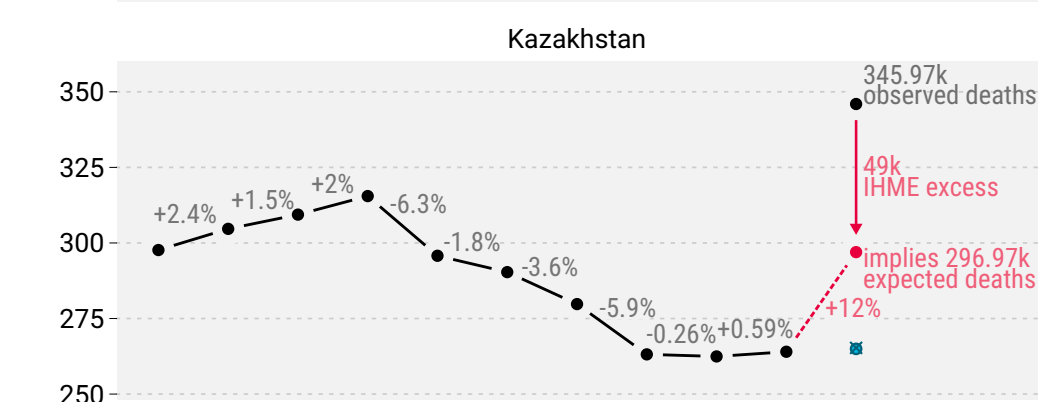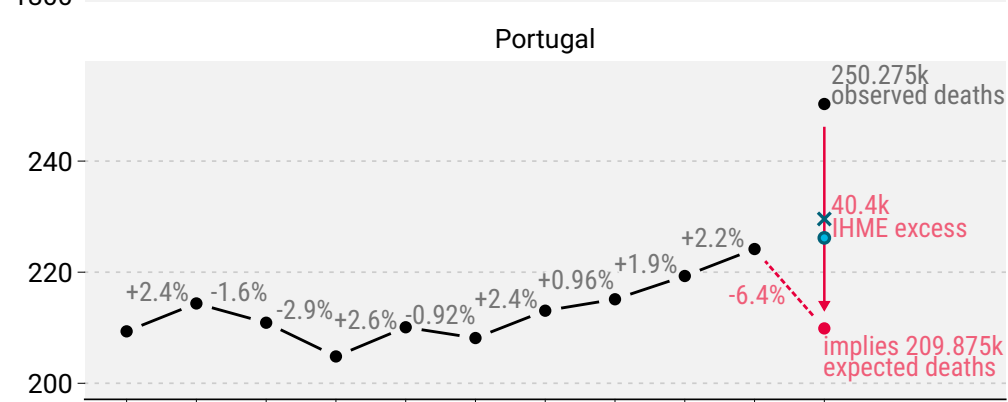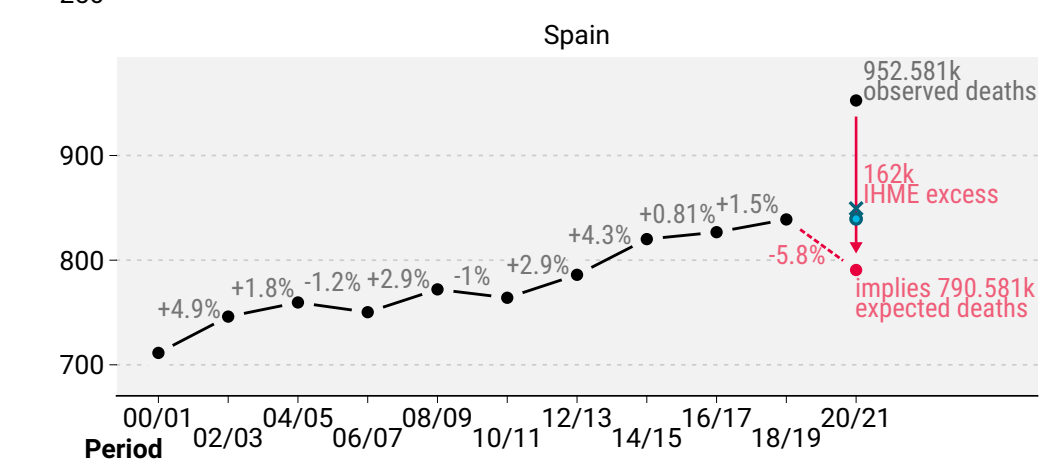

 Blue crosses mark the Economist's expected death estimates for 2020/21 aggregated from weekly or monthly counts.  
 Blue circles mark the World Mortality Dataset's expected death estimates for 2020/21.
